# Supplementary material
Source: ML conference proceedings conference paper supplement (https://proceedings.mlr.press/v130/greenewald21a.html)
Supplement: Supplementary file 2 [file greenewald21a-supp.zip]

Archive with 2 entries (2 files):
- AISTATS21_Sparse_Causal_EffectsSupplement.pdf
- __MACOSX/._AISTATS21_Sparse_Causal_EffectsSupplement.pdf
